# Supplementary material for: Antioxidant, Antiviral, and Anti-Inflammatory Activities of Lutein-Enriched Extract of Tetraselmis Species
Source: MDPI journal article supplement (doi:10.3390/md21070369), 2023-06-21
Supplement: s1 [file s1]

## Supplementary materials

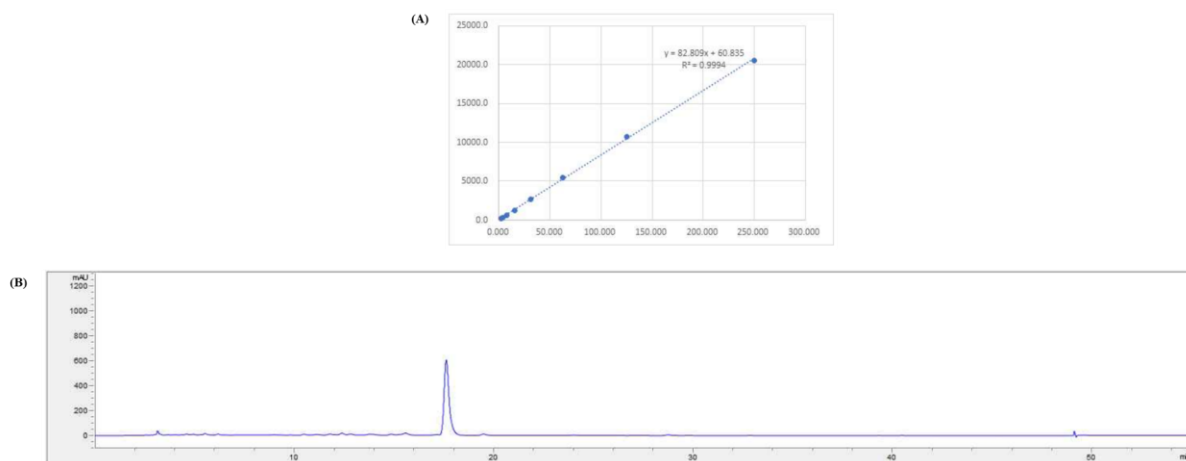

**Figure S1. The standard chromatogram of lutein.** (A) Calibration curve of lutein. (B) HPLC chromatogram of standard lutein
